# Supplementary material for: Multispecies genome-wide analysis defines the MAP3K gene family in Gossypium hirsutum and reveals conserved family expansions
Source: BMC Bioinformatics. 2019 Mar 14;20(Suppl 2):99. doi: 10.1186/s12859-019-2624-9 (PMC6419318; doi:10.1186/s12859-019-2624-9)
Supplement: Supplementary file 5 — Table containing McScanX predicted gene duplication origins for MAP3Ks in examined species. (XLSX 24 kb) [file 12859_2019_2624_MOESM5_ESM.xlsx]

## Sheet: Sheet1
	RAFs					MEKKs						ZIKs
	ID	Code	Dup
	AT1G04700	1	Dispersed			AT1G05100	4	WGD/segmental				AT1G49160	4	WGD/segmental
	AT1G08720	1	Dispersed			AT1G07150	4	WGD/segmental				AT1G64630	1	Dispersed
	AT1G14000	1	Dispersed			AT1G09000	4	WGD/segmental				AT3G04910	4	WGD/segmental
	AT1G62400	1	Dispersed			AT1G53570	1	Dispersed				AT3G18750	4	WGD/segmental
	AT1G67890	1	Dispersed			AT1G54960	4	WGD/segmental				AT3G22420	1	Dispersed
	AT2G31010	1	Dispersed			AT1G63700	1	Dispersed				AT3G48260	1	Dispersed
	AT2G31800	1	Dispersed			AT2G05060	1	Dispersed				AT3G51630	1	Dispersed
	AT2G35050	1	Dispersed			AT2G30040	4	WGD/segmental				AT5G28080	4	WGD/segmental
	AT3G01490	1	Dispersed			AT2G32510	4	WGD/segmental				AT5G41990	1	Dispersed
	AT3G24715	1	Dispersed			AT2G34290	1	Dispersed				AT5G55560	1	Dispersed
	AT3G46920	1	Dispersed			AT2G40500	2	Proximal				AT5G58350	1	Dispersed
	AT3G58760	1	Dispersed			AT2G40560	2	Proximal				Glyma.01G132000	4	WGD/segmental
	AT4G18950	1	Dispersed			AT2G40580	2	Proximal				Glyma.02G235700	4	WGD/segmental
	AT4G23050	1	Dispersed			AT2G41910	3	Tandem				Glyma.02G297200	4	WGD/segmental
	AT4G24480	1	Dispersed			AT2G41920	3	Tandem				Glyma.02G306500	4	WGD/segmental
	AT4G38470	1	Dispersed			AT2G41930	3	Tandem				Glyma.03G036500	4	WGD/segmental
	AT5G01850	1	Dispersed			AT2G42550	1	Dispersed				Glyma.03G245500	4	WGD/segmental
	AT5G03730	1	Dispersed			AT3G06030	1	Dispersed				Glyma.04G188800	4	WGD/segmental
	AT5G07140	1	Dispersed			AT3G07980	1	Dispersed				Glyma.06G151000	4	WGD/segmental
	AT5G11850	1	Dispersed			AT3G13530	1	Dispersed				Glyma.06G176800	4	WGD/segmental
	AT5G50000	1	Dispersed			AT3G45670	1	Dispersed				Glyma.07G053500	4	WGD/segmental
	AT5G50180	1	Dispersed			AT3G45790	1	Dispersed				Glyma.08G325600	4	WGD/segmental
	AT5G57610	1	Dispersed			AT3G46140	2	Proximal				Glyma.09G276300	4	WGD/segmental
	AT3G06630	3	Tandem			AT3G46160	2	Proximal				Glyma.10G092400	1	Dispersed
	AT3G06640	3	Tandem			AT3G50310	4	WGD/segmental				Glyma.10G160400	4	WGD/segmental
	AT3G50730	3	Tandem			AT4G08470	4	WGD/segmental				Glyma.10G248400	4	WGD/segmental
	AT1G16270	4	WGD/segmental			AT4G08480	3	Tandem				Glyma.11G159900	4	WGD/segmental
	AT1G18160	4	WGD/segmental			AT4G08500	2	Proximal				Glyma.13G002100	4	WGD/segmental
	AT1G73660	4	WGD/segmental			AT4G12020	1	Dispersed				Glyma.14G006600	4	WGD/segmental
	AT1G79570	4	WGD/segmental			AT4G26890	4	WGD/segmental				Glyma.14G016400	4	WGD/segmental
	AT2G17700	4	WGD/segmental			AT4G36950	4	WGD/segmental				Glyma.14G203700	4	WGD/segmental
	AT2G24360	4	WGD/segmental			AT5G12090	1	Dispersed				Glyma.16G022600	4	WGD/segmental
	AT2G42640	4	WGD/segmental			AT5G27510	1	Dispersed				Glyma.18G054100	4	WGD/segmental
	AT2G43850	4	WGD/segmental			AT5G27790	1	Dispersed				Glyma.18G081500	4	WGD/segmental
	AT3G06620	4	WGD/segmental			AT5G55090	4	WGD/segmental				Glyma.18G215100	4	WGD/segmental
	AT3G22750	4	WGD/segmental			AT5G66850	1	Dispersed				Glyma.19G242900	4	WGD/segmental
	AT3G27560	4	WGD/segmental			AT5G67080	4	WGD/segmental				Glyma.20G066900	4	WGD/segmental
	AT3G46930	4	WGD/segmental			Glyma.01G043100	1	Dispersed				Glyma.20G145800	4	WGD/segmental
	AT3G50720	4	WGD/segmental			Glyma.01G184000	4	WGD/segmental				Glyma.20G228000	4	WGD/segmental
	AT3G58640	4	WGD/segmental			Glyma.01G186900	4	WGD/segmental				Gohir.1Z041900	NA	NA
	AT3G59830	4	WGD/segmental			Glyma.01G220700	4	WGD/segmental				Gohir.A01G086900	4	WGD/segmental
	AT3G63260	4	WGD/segmental			Glyma.02G228300	4	WGD/segmental				Gohir.A02G031800	4	WGD/segmental
	AT4G14780	4	WGD/segmental			Glyma.03G106000	2	Proximal				Gohir.A02G097500	4	WGD/segmental
	AT4G31170	4	WGD/segmental			Glyma.03G106200	2	Proximal				Gohir.A05G386300	4	WGD/segmental
	AT4G35780	4	WGD/segmental			Glyma.03G237600	4	WGD/segmental				Gohir.A07G056400	4	WGD/segmental
	AT5G40540	4	WGD/segmental			Glyma.04G036300	4	WGD/segmental				Gohir.A08G124300	4	WGD/segmental
	AT5G49470	4	WGD/segmental			Glyma.04G213000	4	WGD/segmental				Gohir.A09G244300	4	WGD/segmental
	AT5G58950	4	WGD/segmental			Glyma.04G253500	4	WGD/segmental				Gohir.A10G149800	4	WGD/segmental
	AT5G66710	4	WGD/segmental			Glyma.05G080900	4	WGD/segmental				Gohir.A11G150300	4	WGD/segmental
						Glyma.05G094400	4	WGD/segmental				Gohir.A11G226100	4	WGD/segmental
	Glyma.01G217100	1	Dispersed			Glyma.05G123200	4	WGD/segmental				Gohir.A11G255500	4	WGD/segmental
	Glyma.02G165800	1	Dispersed			Glyma.05G191700	4	WGD/segmental				Gohir.A12G239100	4	WGD/segmental
	Glyma.08G237200	1	Dispersed			Glyma.06G036400	4	WGD/segmental				Gohir.A13G235500	4	WGD/segmental
	Glyma.10G104500	1	Dispersed			Glyma.06G108900	4	WGD/segmental				Gohir.D01G073100	4	WGD/segmental
	Glyma.15G271100	2	Proximal			Glyma.06G153200	4	WGD/segmental				Gohir.D02G038500	4	WGD/segmental
	Glyma.15G261200	3	Tandem			Glyma.06G226000	1	Dispersed				Gohir.D04G023400	4	WGD/segmental
	Glyma.01G052600	4	WGD/segmental			Glyma.06G243900	2	Proximal				Gohir.D07G060700	4	WGD/segmental
	Glyma.01G132300	4	WGD/segmental			Glyma.06G244200	2	Proximal				Gohir.D08G145400	4	WGD/segmental
	Glyma.01G161600	4	WGD/segmental			Glyma.06G307600	4	WGD/segmental				Gohir.D09G245200	4	WGD/segmental
	Glyma.01G236100	4	WGD/segmental			Glyma.08G015500	4	WGD/segmental				Gohir.D10G117000	4	WGD/segmental
	Glyma.02G288300	4	WGD/segmental			Glyma.08G078200	4	WGD/segmental				Gohir.D11G156800	4	WGD/segmental
	Glyma.03G036000	4	WGD/segmental			Glyma.08G156900	4	WGD/segmental				Gohir.D11G231300	4	WGD/segmental
	Glyma.03G191000	4	WGD/segmental			Glyma.09G005500	4	WGD/segmental				Gohir.D11G265300	4	WGD/segmental
	Glyma.04G020100	4	WGD/segmental			Glyma.09G135100	4	WGD/segmental				Gohir.D12G240300	4	WGD/segmental
	Glyma.04G096000	4	WGD/segmental			Glyma.10G232800	4	WGD/segmental				Gohir.D13G139300	4	WGD/segmental
	Glyma.04G181500	4	WGD/segmental			Glyma.10G250800	4	WGD/segmental				Gohir.D13G241200	4	WGD/segmental
	Glyma.04G182700	4	WGD/segmental			Glyma.11G022900	4	WGD/segmental				Gorai.001G064400	4	WGD/segmental
	Glyma.04G188200	4	WGD/segmental			Glyma.11G054400	2	Proximal				Gorai.002G096100	4	WGD/segmental
	Glyma.05G002600	4	WGD/segmental			Glyma.11G055100	4	WGD/segmental				Gorai.003G069600	1	Dispersed
	Glyma.05G036600	4	WGD/segmental			Glyma.11G058300	4	WGD/segmental				Gorai.003G075600	4	WGD/segmental
	Glyma.05G037200	4	WGD/segmental			Glyma.11G101700	4	WGD/segmental				Gorai.004G150400	1	Dispersed
	Glyma.05G167600	4	WGD/segmental			Glyma.11G170000	4	WGD/segmental				Gorai.005G042400	1	Dispersed
	Glyma.05G220200	4	WGD/segmental			Glyma.12G027600	4	WGD/segmental				Gorai.006G269500	4	WGD/segmental
	Glyma.05G245300	4	WGD/segmental			Glyma.12G097200	4	WGD/segmental				Gorai.007G167300	4	WGD/segmental
	Glyma.06G097700	4	WGD/segmental			Glyma.12G164900	4	WGD/segmental				Gorai.007G285300	1	Dispersed
	Glyma.06G177700	4	WGD/segmental			Glyma.12G192500	4	WGD/segmental				Gorai.008G257300	4	WGD/segmental
	Glyma.06G182900	4	WGD/segmental			Glyma.13G084100	4	WGD/segmental				Gorai.011G128900	4	WGD/segmental
	Glyma.06G183500	4	WGD/segmental			Glyma.13G309900	4	WGD/segmental				Gorai.012G033500	1	Dispersed
	Glyma.06G276900	4	WGD/segmental			Glyma.14G080100	4	WGD/segmental				Gorai.013G156000	4	WGD/segmental
	Glyma.07G101600	4	WGD/segmental			Glyma.14G165700	4	WGD/segmental				Gorai.013G272100	4	WGD/segmental
	Glyma.07G197200	4	WGD/segmental			Glyma.14G166000	2	Proximal				GRMZM2G021416	4	WGD/segmental
	Glyma.07G228000	4	WGD/segmental			Glyma.14G195300	4	WGD/segmental				GRMZM2G023444	4	WGD/segmental
	Glyma.07G239600	4	WGD/segmental			Glyma.15G048500	4	WGD/segmental				GRMZM2G032619	1	Dispersed
	Glyma.07G264700	4	WGD/segmental			Glyma.15G048600	3	Tandem				GRMZM2G034779	4	WGD/segmental
	Glyma.08G026500	4	WGD/segmental			Glyma.16G001200	4	WGD/segmental				GRMZM2G084791	4	WGD/segmental
	Glyma.08G052700	4	WGD/segmental			Glyma.16G181000	4	WGD/segmental				GRMZM2G089159	1	Dispersed
	Glyma.08G126000	4	WGD/segmental			Glyma.17G173000	4	WGD/segmental				GRMZM2G116376	1	Dispersed
	Glyma.08G151400	4	WGD/segmental			Glyma.17G177900	4	WGD/segmental				GRMZM2G312970	4	WGD/segmental
	Glyma.08G165800	4	WGD/segmental			Glyma.17G245300	4	WGD/segmental				GRMZM5G878530	1	Dispersed
	Glyma.08G165900	4	WGD/segmental			Glyma.18G060900	4	WGD/segmental				Solyc01g096170.2	4	WGD/segmental
	Glyma.08G356500	4	WGD/segmental			Glyma.18G244200	1	Dispersed				Solyc01g097840.2	1	Dispersed
	Glyma.09G009100	4	WGD/segmental			Glyma.19G235200	4	WGD/segmental				Solyc03g112140.2	4	WGD/segmental
	Glyma.09G035400	4	WGD/segmental			Glyma.20G142900	4	WGD/segmental				Solyc05g041420.2	1	Dispersed
	Glyma.09G177600	4	WGD/segmental			Glyma.20G161500	4	WGD/segmental				Solyc06g071800.2	4	WGD/segmental
	Glyma.09G275900	4	WGD/segmental			Gohir.1Z039900	NA	NA				Solyc06g082470.2	1	Dispersed
	Glyma.10G066000	4	WGD/segmental			Gohir.A01G013000	4	WGD/segmental				Solyc07g047990.1	1	Dispersed
	Glyma.10G159200	4	WGD/segmental			Gohir.A01G082200	4	WGD/segmental				Solyc07g065250.2	1	Dispersed
	Glyma.10G192700	4	WGD/segmental			Gohir.A02G068000	4	WGD/segmental				Solyc08g082980.2	4	WGD/segmental
	Glyma.10G226300	4	WGD/segmental			Gohir.A02G074800	4	WGD/segmental				Solyc09g018170.2	1	Dispersed
	Glyma.10G284400	4	WGD/segmental			Gohir.A02G156800	4	WGD/segmental				Solyc09g076000.2	1	Dispersed
	Glyma.11G007100	4	WGD/segmental			Gohir.A03G028800	4	WGD/segmental				Solyc10g009060.1	1	Dispersed
	Glyma.11G082200	4	WGD/segmental			Gohir.A03G164300	4	WGD/segmental				Solyc10g009350.2	4	WGD/segmental
	Glyma.12G128700	4	WGD/segmental			Gohir.A05G171900	4	WGD/segmental
	Glyma.12G211000	4	WGD/segmental			Gohir.A05G199900	4	WGD/segmental
	Glyma.13G094500	4	WGD/segmental			Gohir.A05G232100	4	WGD/segmental
	Glyma.13G151100	4	WGD/segmental			Gohir.A05G385300	4	WGD/segmental
	Glyma.13G169300	4	WGD/segmental			Gohir.A08G183300	4	WGD/segmental
	Glyma.13G179000	4	WGD/segmental			Gohir.A08G201200	4	WGD/segmental
	Glyma.13G223400	4	WGD/segmental			Gohir.A09G050200	1	Dispersed
	Glyma.13G238400	4	WGD/segmental			Gohir.A09G055300	4	WGD/segmental
	Glyma.13G290400	4	WGD/segmental			Gohir.A10G012200	4	WGD/segmental
	Glyma.14G026700	4	WGD/segmental			Gohir.A10G091500	4	WGD/segmental
	Glyma.14G094400	4	WGD/segmental			Gohir.A10G092900	4	WGD/segmental
	Glyma.14G182700	4	WGD/segmental			Gohir.A11G045900	4	WGD/segmental
	Glyma.15G074900	4	WGD/segmental			Gohir.A11G264700	4	WGD/segmental
	Glyma.15G088500	4	WGD/segmental			Gohir.A12G001400	4	WGD/segmental
	Glyma.15G113500	4	WGD/segmental			Gohir.A12G069900	4	WGD/segmental
	Glyma.15G202000	4	WGD/segmental			Gohir.A12G072100	4	WGD/segmental
	Glyma.15G213400	4	WGD/segmental			Gohir.A12G134300	4	WGD/segmental
	Glyma.15G261100	4	WGD/segmental			Gohir.A13G233100	4	WGD/segmental
	Glyma.15G270700	4	WGD/segmental			Gohir.D01G014300	4	WGD/segmental
	Glyma.16G069200	4	WGD/segmental			Gohir.D01G068800	4	WGD/segmental
	Glyma.17G009300	4	WGD/segmental			Gohir.D02G074000	4	WGD/segmental
	Glyma.17G033700	4	WGD/segmental			Gohir.D02G081800	4	WGD/segmental
	Glyma.17G065700	4	WGD/segmental			Gohir.D02G187600	4	WGD/segmental
	Glyma.17G090000	4	WGD/segmental			Gohir.D03G023900	4	WGD/segmental
	Glyma.17G090600	4	WGD/segmental			Gohir.D03G139800	4	WGD/segmental
	Glyma.17G105100	4	WGD/segmental			Gohir.D04G022500	4	WGD/segmental
	Glyma.17G229100	4	WGD/segmental			Gohir.D05G107500	4	WGD/segmental
	Glyma.18G174200	4	WGD/segmental			Gohir.D05G175000	4	WGD/segmental
	Glyma.19G002800	4	WGD/segmental			Gohir.D05G202900	4	WGD/segmental
	Glyma.19G009500	4	WGD/segmental			Gohir.D08G201900	4	WGD/segmental
	Glyma.19G056300	4	WGD/segmental			Gohir.D08G218400	4	WGD/segmental
	Glyma.19G191600	4	WGD/segmental			Gohir.D09G043100	1	Dispersed
	Glyma.20G031300	4	WGD/segmental			Gohir.D09G054200	4	WGD/segmental
	Glyma.20G105300	4	WGD/segmental			Gohir.D10G011600	4	WGD/segmental
	Glyma.20G149000	4	WGD/segmental			Gohir.D10G095400	4	WGD/segmental
	Glyma.20G165800	4	WGD/segmental			Gohir.D10G096700	4	WGD/segmental
	Glyma.20G197800	4	WGD/segmental			Gohir.D11G049500	4	WGD/segmental
	Glyma.20G229500	4	WGD/segmental			Gohir.D11G199800	4	WGD/segmental
						Gohir.D11G274900	4	WGD/segmental
	Gohir.A01G151500	1	Dispersed			Gohir.D12G001200	4	WGD/segmental
	Gohir.A03G057000	1	Dispersed			Gohir.D12G070000	4	WGD/segmental
	Gohir.A06G123300	1	Dispersed			Gohir.D12G089300	4	WGD/segmental
	Gohir.A08G086100	1	Dispersed			Gohir.D12G137900	4	WGD/segmental
	Gohir.A13G085100	1	Dispersed			Gohir.D13G238700	4	WGD/segmental
	Gohir.D08G118400	1	Dispersed			Gorai.002G016000	4	WGD/segmental
	Gohir.D02G059800	3	Tandem			Gorai.002G091000	4	WGD/segmental
	Gohir.A01G001900	4	WGD/segmental			Gorai.003G025400	4	WGD/segmental
	Gohir.A01G099800	4	WGD/segmental			Gorai.003G146500	4	WGD/segmental
	Gohir.A01G171300	4	WGD/segmental			Gorai.004G213200	1	Dispersed
	Gohir.A02G003900	4	WGD/segmental			Gorai.004G232400	4	WGD/segmental
	Gohir.A02G007000	4	WGD/segmental			Gorai.005G083400	4	WGD/segmental
	Gohir.A02G024800	4	WGD/segmental			Gorai.005G091700	4	WGD/segmental
	Gohir.A02G033700	4	WGD/segmental			Gorai.005G210100	4	WGD/segmental
	Gohir.A02G054800	4	WGD/segmental			Gorai.006G049500	1	Dispersed
	Gohir.A02G064900	4	WGD/segmental			Gorai.006G052900	1	Dispersed
	Gohir.A02G175000	4	WGD/segmental			Gorai.007G053300	4	WGD/segmental
	Gohir.A03G017700	4	WGD/segmental			Gorai.007G213900	4	WGD/segmental
	Gohir.A03G096700	4	WGD/segmental			Gorai.007G296700	1	Dispersed
	Gohir.A03G102400	4	WGD/segmental			Gorai.008G000500	1	Dispersed
	Gohir.A04G066300	4	WGD/segmental			Gorai.008G073600	4	WGD/segmental
	Gohir.A04G132100	4	WGD/segmental			Gorai.008G077000	4	WGD/segmental
	Gohir.A05G005800	4	WGD/segmental			Gorai.008G149400	4	WGD/segmental
	Gohir.A05G011400	4	WGD/segmental			Gorai.009G111600	4	WGD/segmental
	Gohir.A05G042400	4	WGD/segmental			Gorai.009G180300	4	WGD/segmental
	Gohir.A05G066500	4	WGD/segmental			Gorai.009G208800	4	WGD/segmental
	Gohir.A05G161300	4	WGD/segmental			Gorai.009G242600	4	WGD/segmental
	Gohir.A05G182300	4	WGD/segmental			Gorai.011G012900	4	WGD/segmental
	Gohir.A05G218900	4	WGD/segmental			Gorai.011G104700	4	WGD/segmental
	Gohir.A05G242600	4	WGD/segmental			Gorai.011G106000	4	WGD/segmental
	Gohir.A05G355100	4	WGD/segmental			Gorai.012G034500	4	WGD/segmental
	Gohir.A05G359500	4	WGD/segmental			Gorai.013G269600	4	WGD/segmental
	Gohir.A05G374000	4	WGD/segmental			AC197029.3	0	singleton
	Gohir.A05G377800	4	WGD/segmental			AC204050.4	0	singleton
	Gohir.A06G031600	4	WGD/segmental			AC209208.3	0	singleton
	Gohir.A06G050100	4	WGD/segmental			GRMZM2G017654	4	WGD/segmental
	Gohir.A06G089200	4	WGD/segmental			GRMZM2G034877	4	WGD/segmental
	Gohir.A06G152500	4	WGD/segmental			GRMZM2G041774	4	WGD/segmental
	Gohir.A07G001100	4	WGD/segmental			GRMZM2G044557	4	WGD/segmental
	Gohir.A07G155400	4	WGD/segmental			GRMZM2G064613	4	WGD/segmental
	Gohir.A07G219500	4	WGD/segmental			GRMZM2G066120	4	WGD/segmental
	Gohir.A07G223900	4	WGD/segmental			GRMZM2G093316	4	WGD/segmental
	Gohir.A08G065000	4	WGD/segmental			GRMZM2G098828	4	WGD/segmental
	Gohir.A08G193900	4	WGD/segmental			GRMZM2G130927	4	WGD/segmental
	Gohir.A08G214000	4	WGD/segmental			GRMZM2G140726	4	WGD/segmental
	Gohir.A09G029800	4	WGD/segmental			GRMZM2G156800	4	WGD/segmental
	Gohir.A09G066200	4	WGD/segmental			GRMZM2G158860	1	Dispersed
	Gohir.A09G135600	4	WGD/segmental			GRMZM2G165099	3	WGD/segmental
	Gohir.A09G218000	4	WGD/segmental			GRMZM2G173965	4	WGD/segmental
	Gohir.A09G234600	4	WGD/segmental			GRMZM2G175504	4	WGD/segmental
	Gohir.A10G009900	4	WGD/segmental			GRMZM2G180555	4	WGD/segmental
	Gohir.A10G026400	4	WGD/segmental			GRMZM2G305066	4	WGD/segmental
	Gohir.A10G033200	4	WGD/segmental			GRMZM2G335826	4	WGD/segmental
	Gohir.A10G146900	4	WGD/segmental			GRMZM2G378852	4	WGD/segmental
	Gohir.A10G172600	4	WGD/segmental			GRMZM2G404078	3	Tandem
	Gohir.A11G067500	4	WGD/segmental			GRMZM2G439350	4	WGD/segmental
	Gohir.A11G171500	4	WGD/segmental			GRMZM2G459824	4	WGD/segmental
	Gohir.A11G186200	4	WGD/segmental			GRMZM2G476477	4	WGD/segmental
	Gohir.A11G256500	4	WGD/segmental			GRMZM2G540772	1	Dispersed
	Gohir.A12G003500	4	WGD/segmental			GRMZM6G513881	1	Dispersed
	Gohir.A12G047900	4	WGD/segmental			Solyc01g079750.2	4	WGD/segmental
	Gohir.A12G109400	4	WGD/segmental			Solyc01g098980.2	4	WGD/segmental
	Gohir.A12G163500	4	WGD/segmental			Solyc01g103240.2	1	Dispersed
	Gohir.A12G268600	4	WGD/segmental			Solyc01g104530.2	1	Dispersed
	Gohir.A12G273500	4	WGD/segmental			Solyc02g064870.1	3	Tandem
	Gohir.D01G001500	4	WGD/segmental			Solyc02g064930.1	3	Tandem
	Gohir.D01G084300	4	WGD/segmental			Solyc02g064980.1	4	WGD/segmental
	Gohir.D01G129100	4	WGD/segmental			Solyc02g065110.2	4	WGD/segmental
	Gohir.D01G162300	4	WGD/segmental			Solyc02g090430.2	4	WGD/segmental
	Gohir.D02G004300	4	WGD/segmental			Solyc02g090970.1	4	WGD/segmental
	Gohir.D02G006600	4	WGD/segmental			Solyc02g090980.1	3	Tandem
	Gohir.D02G032000	4	WGD/segmental			Solyc02g090990.1	3	Tandem
	Gohir.D02G040300	4	WGD/segmental			Solyc03g025360.2	4	WGD/segmental
	Gohir.D02G059700	4	WGD/segmental			Solyc03g117640.1	4	WGD/segmental
	Gohir.D02G070800	4	WGD/segmental			Solyc04g079400.2	4	WGD/segmental
	Gohir.D02G117000	4	WGD/segmental			Solyc06g036080.2	4	WGD/segmental
	Gohir.D02G127300	4	WGD/segmental			Solyc06g065660.1	2	Proximal
	Gohir.D03G004800	4	WGD/segmental			Solyc06g065790.1	2	Proximal
	Gohir.D03G153900	4	WGD/segmental			Solyc06g068510.1	4	WGD/segmental
	Gohir.D04G037900	4	WGD/segmental			Solyc07g047910.1	1	Dispersed
	Gohir.D04G041500	4	WGD/segmental			Solyc07g051860.1	4	WGD/segmental
	Gohir.D04G054600	4	WGD/segmental			Solyc07g051870.1	3	Tandem
	Gohir.D04G058100	4	WGD/segmental			Solyc07g051880.1	3	Tandem
	Gohir.D04G104400	4	WGD/segmental			Solyc07g051890.1	3	Tandem
	Gohir.D04G168700	4	WGD/segmental			Solyc07g051920.1	3	Tandem
	Gohir.D05G006500	4	WGD/segmental			Solyc07g051930.1	3	Tandem
	Gohir.D05G012100	4	WGD/segmental			Solyc07g053170.2	1	Dispersed
	Gohir.D05G044100	4	WGD/segmental			Solyc07g064820.1	1	Dispersed
	Gohir.D05G069000	4	WGD/segmental			Solyc08g069090.1	2	Proximal
	Gohir.D05G164100	4	WGD/segmental			Solyc08g076490.2	1	Dispersed
	Gohir.D05G185300	4	WGD/segmental			Solyc08g081210.2	1	Dispersed
	Gohir.D05G221600	4	WGD/segmental			Solyc11g006000.1	4	WGD/segmental
	Gohir.D05G244000	4	WGD/segmental			Solyc11g033270.1	1	Dispersed
	Gohir.D05G289200	4	WGD/segmental			Solyc12g088940.1	4	WGD/segmental
	Gohir.D06G030800	4	WGD/segmental
	Gohir.D06G049400	4	WGD/segmental
	Gohir.D06G087700	4	WGD/segmental
	Gohir.D06G140100	4	WGD/segmental
	Gohir.D06G158800	4	WGD/segmental
	Gohir.D06G196600	4	WGD/segmental
	Gohir.D07G001500	4	WGD/segmental
	Gohir.D07G022100	4	WGD/segmental
	Gohir.D07G161700	4	WGD/segmental
	Gohir.D07G226400	4	WGD/segmental
	Gohir.D07G231000	4	WGD/segmental
	Gohir.D08G073500	4	WGD/segmental
	Gohir.D08G211700	4	WGD/segmental
	Gohir.D08G231000	4	WGD/segmental
	Gohir.D09G029500	4	WGD/segmental
	Gohir.D09G065400	4	WGD/segmental
	Gohir.D09G137700	4	WGD/segmental
	Gohir.D09G208700	4	WGD/segmental
	Gohir.D09G210000	4	WGD/segmental
	Gohir.D09G213000	4	WGD/segmental
	Gohir.D09G214400	4	WGD/segmental
	Gohir.D09G220500	4	WGD/segmental
	Gohir.D09G235400	4	WGD/segmental
	Gohir.D10G009600	4	WGD/segmental
	Gohir.D10G027000	4	WGD/segmental
	Gohir.D10G033900	4	WGD/segmental
	Gohir.D10G119200	4	WGD/segmental
	Gohir.D10G150400	4	WGD/segmental
	Gohir.D10G179100	4	WGD/segmental
	Gohir.D11G071400	4	WGD/segmental
	Gohir.D11G130100	4	WGD/segmental
	Gohir.D11G192800	4	WGD/segmental
	Gohir.D11G266300	4	WGD/segmental
	Gohir.D12G003200	4	WGD/segmental
	Gohir.D12G046700	4	WGD/segmental
	Gohir.D12G112400	4	WGD/segmental
	Gohir.D12G166500	4	WGD/segmental
	Gohir.D12G269000	4	WGD/segmental
	Gohir.D12G274200	4	WGD/segmental
	Gohir.D13G077900	4	WGD/segmental
	Gohir.1Z073500
	Gohir.1Z092600
	Gorai.001G001200	1	Dispersed
	Gorai.002G110000	1	Dispersed
	Gorai.003G162100	1	Dispersed
	Gorai.005G035500	1	Dispersed
	Gorai.005G136700	1	Dispersed
	Gorai.007G205800	1	Dispersed
	Gorai.008G049200	1	Dispersed
	Gorai.008G121800	1	Dispersed
	Gorai.008G294700	1	Dispersed
	Gorai.009G069900	1	Dispersed
	Gorai.009G304300	1	Dispersed
	Gorai.012G042800	1	Dispersed
	Gorai.012G046800	1	Dispersed
	Gorai.005G067400	3	Tandem
	Gorai.001G022800	4	WGD/segmental
	Gorai.001G185100	4	WGD/segmental
	Gorai.001G261300	4	WGD/segmental
	Gorai.001G266100	4	WGD/segmental
	Gorai.002G002100	4	WGD/segmental
	Gorai.002G159900	4	WGD/segmental
	Gorai.002G201200	4	WGD/segmental
	Gorai.003G005100	4	WGD/segmental
	Gorai.004G077900	4	WGD/segmental
	Gorai.004G101000	4	WGD/segmental
	Gorai.004G225000	4	WGD/segmental
	Gorai.004G245400	4	WGD/segmental
	Gorai.005G004900	4	WGD/segmental
	Gorai.005G007700	4	WGD/segmental
	Gorai.005G044700	4	WGD/segmental
	Gorai.005G067300	4	WGD/segmental
	Gorai.005G080000	4	WGD/segmental
	Gorai.005G142900	4	WGD/segmental
	Gorai.006G034500	4	WGD/segmental
	Gorai.006G056600	4	WGD/segmental
	Gorai.006G080100	4	WGD/segmental
	Gorai.006G158200	4	WGD/segmental
	Gorai.006G233100	4	WGD/segmental
	Gorai.006G234800	4	WGD/segmental
	Gorai.006G241500	4	WGD/segmental
	Gorai.006G258400	4	WGD/segmental
	Gorai.007G076700	4	WGD/segmental
	Gorai.007G139200	4	WGD/segmental
	Gorai.007G190200	4	WGD/segmental
	Gorai.007G286200	4	WGD/segmental
	Gorai.008G003000	4	WGD/segmental
	Gorai.008G179300	4	WGD/segmental
	Gorai.008G289300	4	WGD/segmental
	Gorai.009G006600	4	WGD/segmental
	Gorai.009G012400	4	WGD/segmental
	Gorai.009G045200	4	WGD/segmental
	Gorai.009G169300	4	WGD/segmental
	Gorai.009G190600	4	WGD/segmental
	Gorai.009G228800	4	WGD/segmental
	Gorai.009G253200	4	WGD/segmental
	Gorai.009G408200	4	WGD/segmental
	Gorai.010G033900	4	WGD/segmental
	Gorai.010G056300	4	WGD/segmental
	Gorai.010G101300	4	WGD/segmental
	Gorai.010G163500	4	WGD/segmental
	Gorai.010G185600	4	WGD/segmental
	Gorai.011G010500	4	WGD/segmental
	Gorai.011G028300	4	WGD/segmental
	Gorai.011G035600	4	WGD/segmental
	Gorai.011G131000	4	WGD/segmental
	Gorai.011G167400	4	WGD/segmental
	Gorai.011G200300	4	WGD/segmental
	Gorai.012G061300	4	WGD/segmental
	Gorai.012G064800	4	WGD/segmental
	Gorai.012G157000	4	WGD/segmental
	Gorai.013G089100	4	WGD/segmental
	GRMZM2G007854	1	Dispersed
	GRMZM2G019434	1	Dispersed
	GRMZM2G028709	1	Dispersed
	GRMZM2G045366	1	Dispersed
	GRMZM2G048243	1	Dispersed
	GRMZM2G059671	1	Dispersed
	GRMZM2G072584	1	Dispersed
	GRMZM2G098187	1	Dispersed
	GRMZM2G104283	1	Dispersed
	GRMZM2G104658	1	Dispersed
	GRMZM2G111269	1	Dispersed
	GRMZM2G114093	1	Dispersed
	GRMZM2G127632	1	Dispersed
	GRMZM2G159034	1	Dispersed
	GRMZM2G160922	1	Dispersed
	GRMZM2G164242	1	Dispersed
	GRMZM2G165231	1	Dispersed
	GRMZM2G171677	1	Dispersed
	GRMZM2G326472	1	Dispersed
	GRMZM2G413069	1	Dispersed
	GRMZM2G448213	1	Dispersed
	GRMZM2G481005	1	Dispersed
	GRMZM2G002531	4	WGD/segmental
	GRMZM2G014618	4	WGD/segmental
	GRMZM2G018280	4	WGD/segmental
	GRMZM2G028604	4	WGD/segmental
	GRMZM2G038982	4	WGD/segmental
	GRMZM2G039106	4	WGD/segmental
	GRMZM2G052658	4	WGD/segmental
	GRMZM2G055334	4	WGD/segmental
	GRMZM2G063069	4	WGD/segmental
	GRMZM2G063684	4	WGD/segmental
	GRMZM2G080499	4	WGD/segmental
	GRMZM2G088299	4	WGD/segmental
	GRMZM2G097878	4	WGD/segmental
	GRMZM2G102088	4	WGD/segmental
	GRMZM2G110572	4	WGD/segmental
	GRMZM2G131629	4	WGD/segmental
	GRMZM2G140537	4	WGD/segmental
	GRMZM2G140612	4	WGD/segmental
	GRMZM2G152889	4	WGD/segmental
	GRMZM2G156013	4	WGD/segmental
	GRMZM2G163141	4	WGD/segmental
	GRMZM2G175563	4	WGD/segmental
	GRMZM2G459854	4	WGD/segmental
	GRMZM2G465833	4	WGD/segmental
	GRMZM2G474546	4	WGD/segmental
	GRMZM5G814851	4	WGD/segmental
	GRMZM2G011070
	Solyc01g010950.2	1	Dispersed
	Solyc01g059860.2	1	Dispersed
	Solyc01g097980.2	1	Dispersed
	Solyc02g076780.2	1	Dispersed
	Solyc02g085620.2	1	Dispersed
	Solyc02g093410.2	1	Dispersed
	Solyc03g114310.2	1	Dispersed
	Solyc03g119140.2	1	Dispersed
	Solyc03g121780.1	1	Dispersed
	Solyc04g071120.2	1	Dispersed
	Solyc04g076480.2	1	Dispersed
	Solyc05g013070.2	1	Dispersed
	Solyc06g068980.2	1	Dispersed
	Solyc07g006760.2	1	Dispersed
	Solyc07g007140.2	1	Dispersed
	Solyc07g042890.2	1	Dispersed
	Solyc07g055130.2	1	Dispersed
	Solyc07g055870.2	1	Dispersed
	Solyc08g014450.2	1	Dispersed
	Solyc08g065250.2	1	Dispersed
	Solyc09g018060.2	1	Dispersed
	Solyc09g082470.2	1	Dispersed
	Solyc09g091460.2	1	Dispersed
	Solyc10g017490.1	1	Dispersed
	Solyc12g013980.1	1	Dispersed
	Solyc12g019410.1	1	Dispersed
	Solyc12g062280.1	1	Dispersed
	Solyc12g094410.1	1	Dispersed
	Solyc12g099250.1	1	Dispersed
	Solyc02g031860.2	2	Proximal
	Solyc02g031910.2	2	Proximal
	Solyc01g111880.2	4	WGD/segmental
	Solyc02g071740.2	4	WGD/segmental
	Solyc02g078140.2	4	WGD/segmental
	Solyc02g083290.2	4	WGD/segmental
	Solyc03g005920.2	4	WGD/segmental
	Solyc03g006400.2	4	WGD/segmental
	Solyc03g114210.2	4	WGD/segmental
	Solyc04g014690.2	4	WGD/segmental
	Solyc06g071410.2	4	WGD/segmental
	Solyc07g042680.2	4	WGD/segmental
	Solyc08g007910.2	4	WGD/segmental
	Solyc08g080460.1	4	WGD/segmental
	Solyc09g009090.2	4	WGD/segmental
	Solyc10g055720.1	4	WGD/segmental
	Solyc10g083610.1	4	WGD/segmental
	Solyc10g085570.1	4	WGD/segmental
	Solyc11g012050.1	4	WGD/segmental
	Solyc12g009340.1	4	WGD/segmental
